# Supplementary material
Source: MDPI journal article supplement (https://www.mdpi.com/2072-4292/12/14/2235)
Supplement: s1 [file s1]

## Supplementary Materials

a)

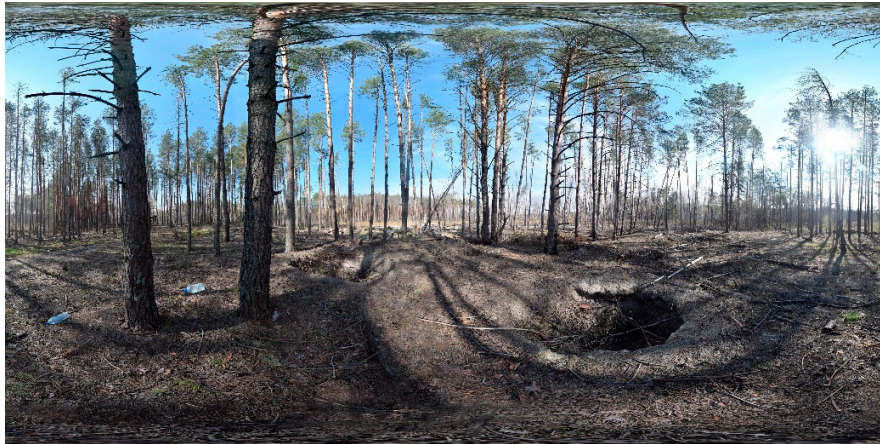

b)

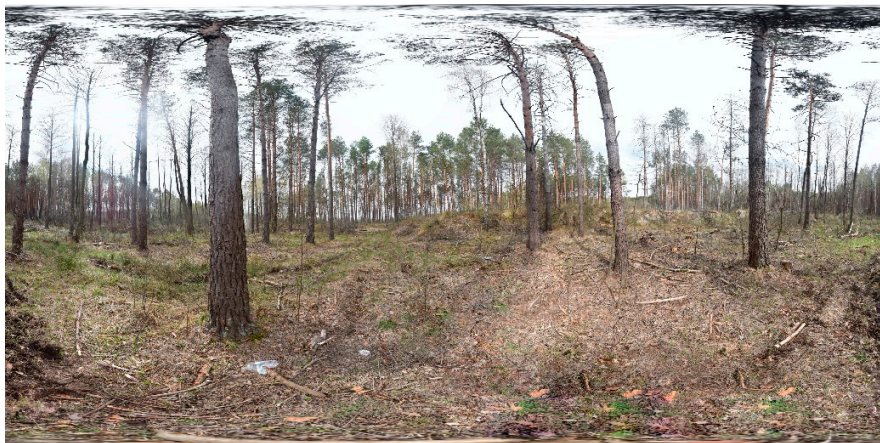

c)

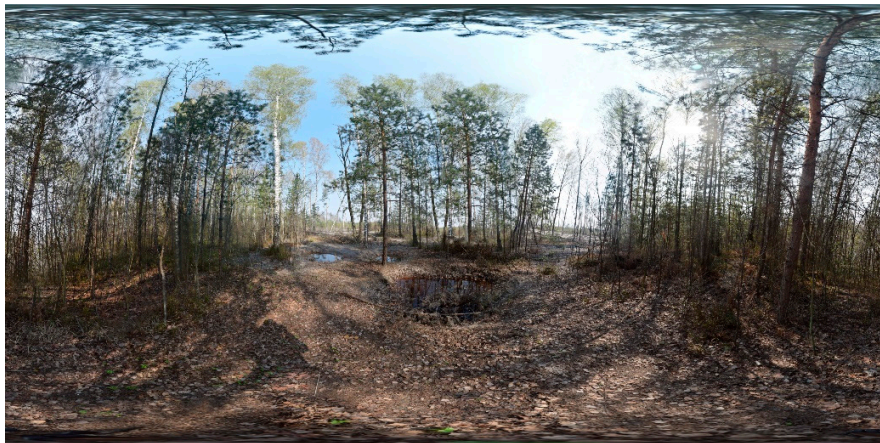

**Figure S1.** Examples of VR360 panoramic images of low level of disturbance caused by amber mining operations available at the links: a) [http://bit.ly/low\\_level\\_of\\_disturbance\\_1](http://bit.ly/low_level_of_disturbance_1) b) [http://bit.ly/low\\_level\\_of\\_disturbance\\_2](http://bit.ly/low_level_of_disturbance_2); c) [http://bit.ly/low\\_level\\_of\\_disturbance\\_3](http://bit.ly/low_level_of_disturbance_3).

a)

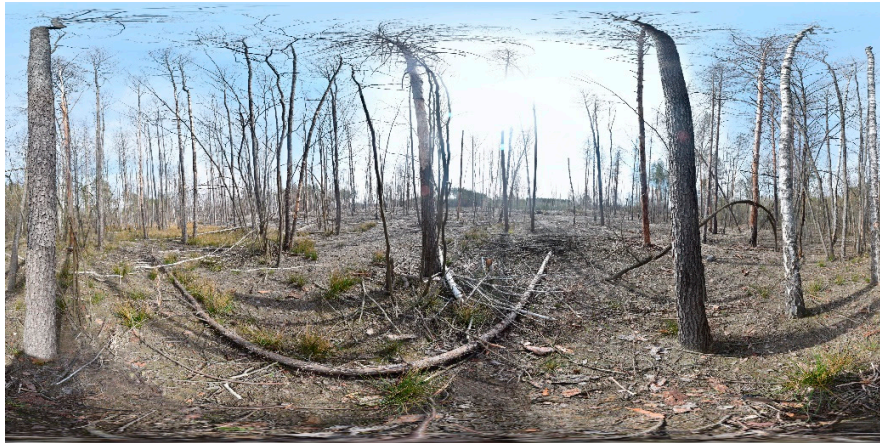

b)

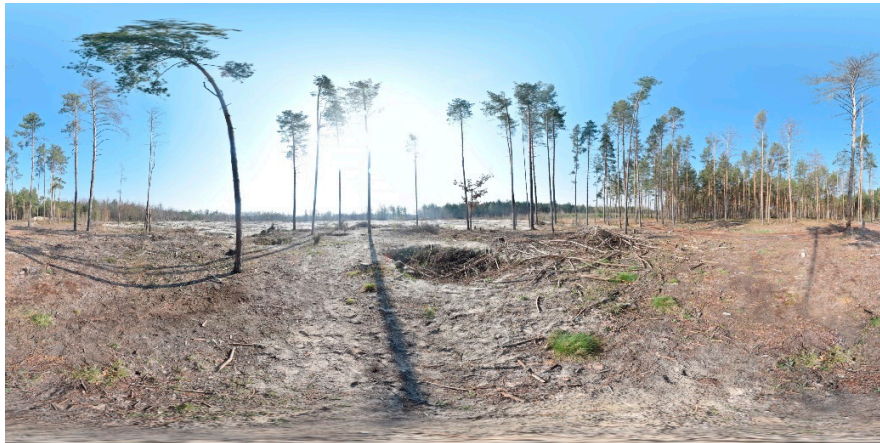

c)

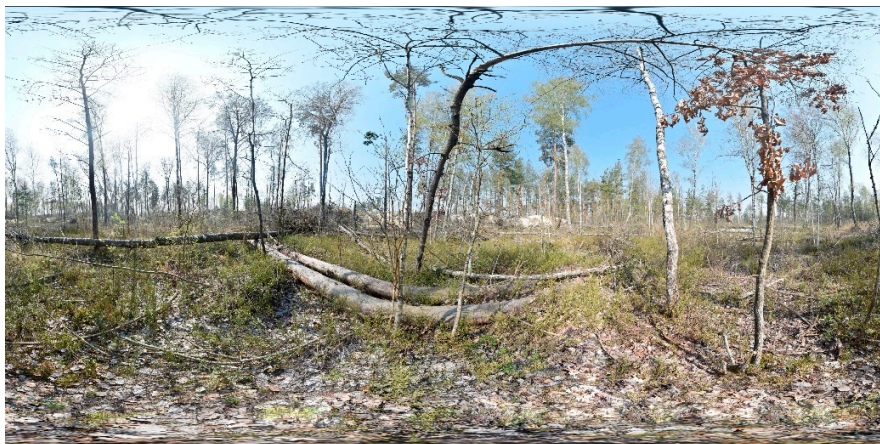

**Figure S2.** Examples of VR360 panoramic images of moderate-low level of disturbance caused by amber mining operations available at the links: a) [http://bit.ly/moderate-low\\_level\\_of\\_disturbance\\_1](http://bit.ly/moderate-low_level_of_disturbance_1) b) [https://bit.ly/moderate-low\\_level\\_of\\_disturbance\\_2](https://bit.ly/moderate-low_level_of_disturbance_2); c) [https://bit.ly/moderate-low\\_level\\_of\\_disturbance\\_3](https://bit.ly/moderate-low_level_of_disturbance_3).

a)

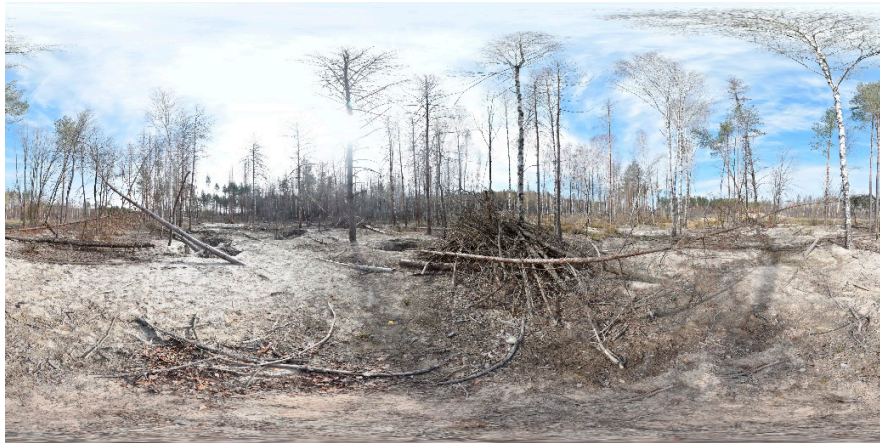

b)

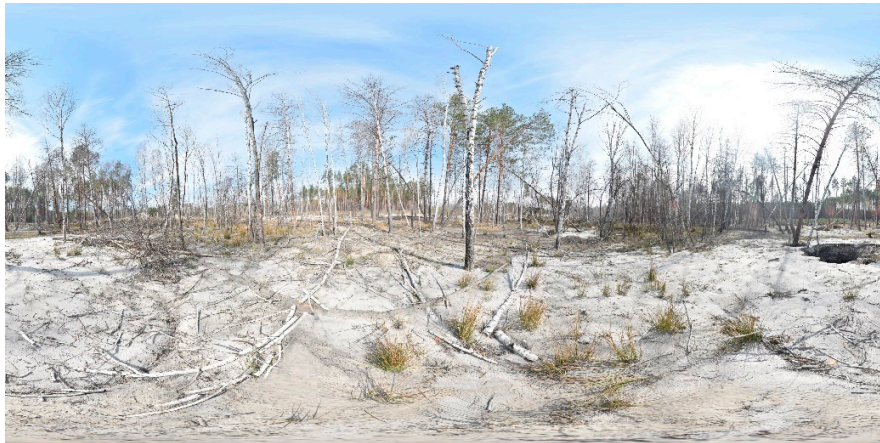

c)

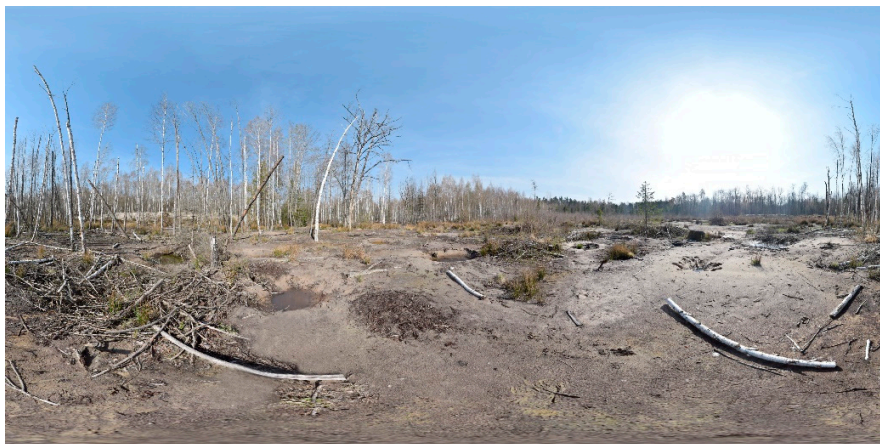

**Figure S3.** Examples of VR360 panoramic images of moderate-high level of disturbance caused by amber mining operations available at the links: a) [https://bit.ly/moderate-high\\_level\\_of\\_disturbance\\_1](https://bit.ly/moderate-high_level_of_disturbance_1); b) [https://bit.ly/moderate-high\\_level\\_of\\_disturbance\\_2](https://bit.ly/moderate-high_level_of_disturbance_2); c) [https://bit.ly/moderate-high\\_level\\_of\\_disturbance\\_3](https://bit.ly/moderate-high_level_of_disturbance_3).

a)

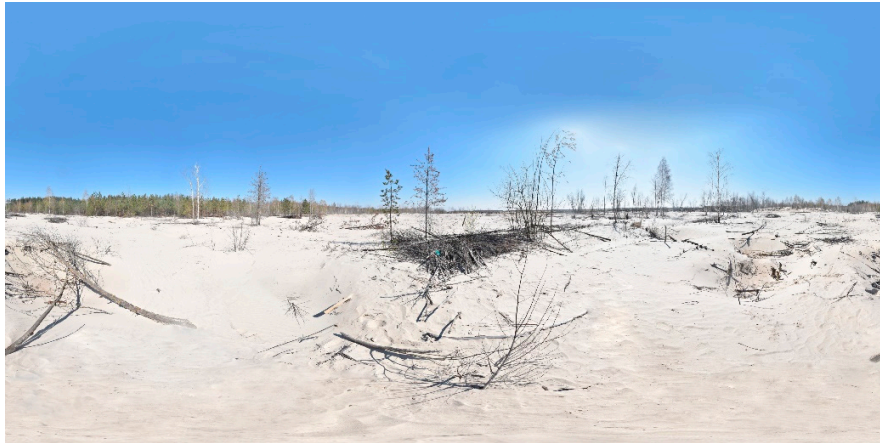

b)

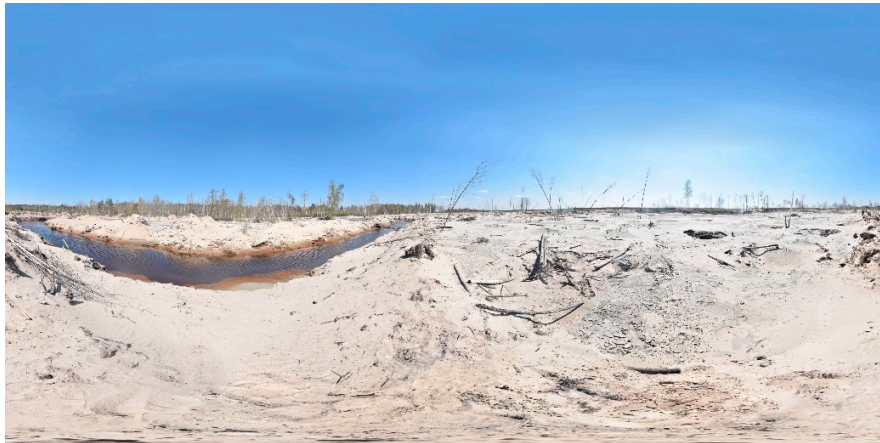

c)

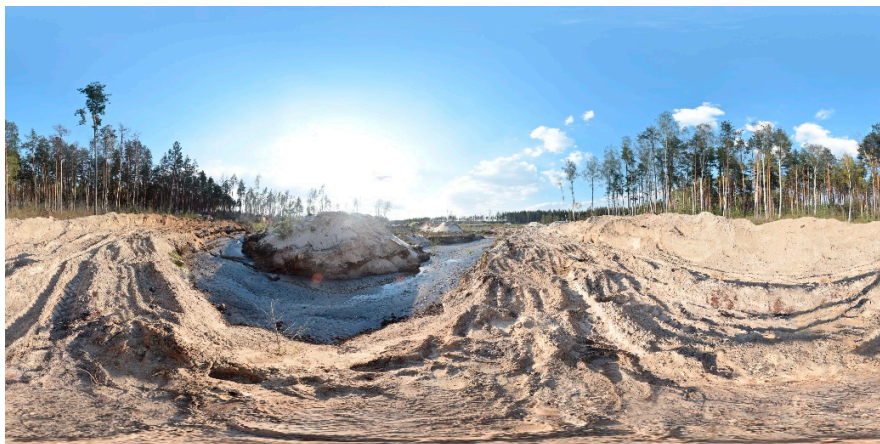

**Figure S4.** Examples of VR360 panoramic images of high level of disturbance caused by amber mining operations available at the links: a) [https://bit.ly/high\\_level\\_of\\_disturbance\\_1](https://bit.ly/high_level_of_disturbance_1); b) [https://bit.ly/high\\_level\\_of\\_disturbance\\_2](https://bit.ly/high_level_of_disturbance_2); c) [https://bit.ly/high\\_level\\_of\\_disturbance\\_3](https://bit.ly/high_level_of_disturbance_3).
